# Supplementary material
Source: PubMed Central journal article supplement (PMC3645553)
Supplement: 1305411110_pnas.201305411SI.pdf [file 1305411110_pnas.201305411SI.pdf]

# Supporting Information

Bowman et al. 10.1073/pnas.1305411110

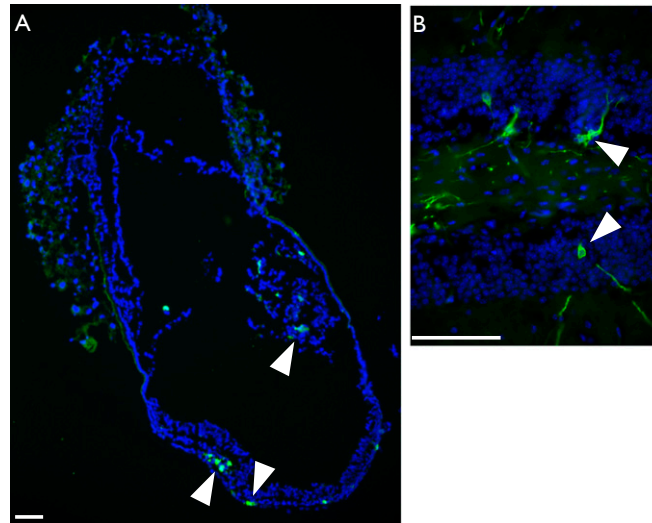

**Fig. S1.** Progeny of tamoxifen-inducible Cre at *Axin2* (*Axin2*<sup>CreERT2/+</sup>) mouse strain cells labeled embryonically contribute to multiple structures. (A) Embryonic day 6.5 (E6.5)–E7.5 tracing of *Axin2*<sup>CreERT2/+</sup>; *Rosa26* membrane tomato/membrane green fluorescent protein (*R26R*<sup>mTmG/+</sup>) embryos reveals green fluorescent protein (GFP<sup>+</sup>) cells in the ectoderm and mesoderm, longitudinal section. (B) E8.5–postnatal day 21 (P21) tracing reveals GFP<sup>+</sup> cells in the subgranular and granular zone of the dentate gyrus of the hippocampus. (Scale bar, 50  $\mu$ m.)

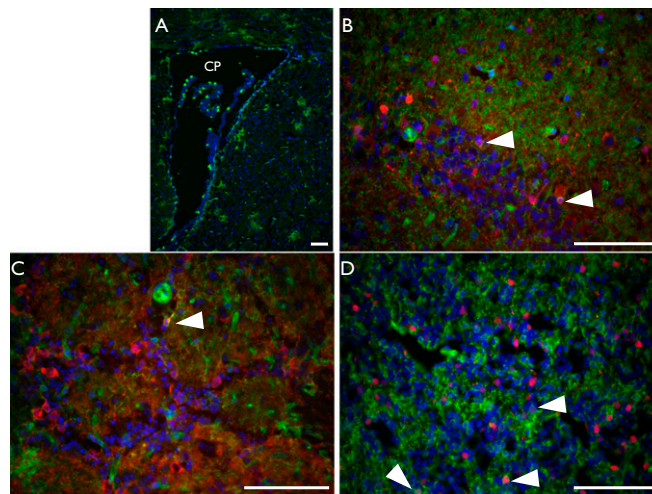

**Fig. S2.** Postnatal subventricular zone (SVZ) cells are broadly Wnt/ $\beta$ -catenin responsive. Representative images of coronal brain sections from *Axin2*<sup>CreERT2/+</sup>; *R26R*<sup>mTmG/+</sup> mice dosed with tamoxifen at P14 and examined at P56. (A) When tamoxifen is administered postnatally GFP<sup>+</sup> cells are found around all surfaces of the ventricle. Postnatally labeled *Axin2*<sup>+</sup> SVZ neural stem cells (NSCs) are able to produce all classes of olfactory bulb neurons, including calbindin<sup>+</sup> cells (B), tyrosine hydroxylase<sup>+</sup> cells (C), and calretinin<sup>+</sup> cells (D). Arrowheads point to double labeled cells. DAPI is shown in blue, GFP is shown in green, and other markers in red. (Scale bar, 50  $\mu$ m.)

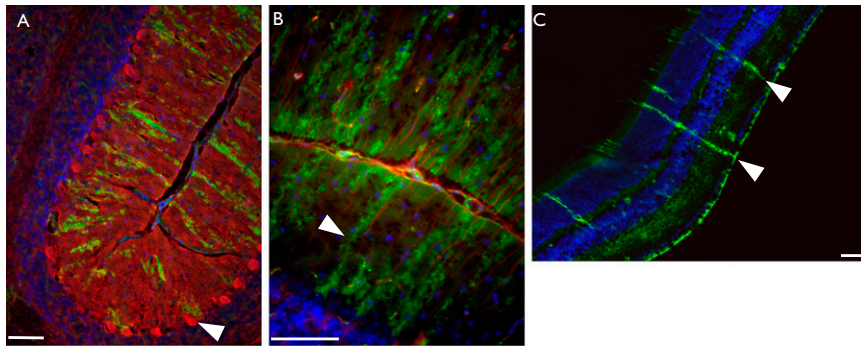

**Fig. S3.** *Axin2<sup>CreERT2</sup>* marks multiple radial glial populations throughout the central nervous system. (A) Postnatal labeling reveals GFP<sup>+</sup> cells in the cerebellum that are calbindin<sup>-</sup> (arrowheads point to calbindin<sup>+</sup> Purkinje cells) and (B) GFAP<sup>+</sup> (arrowheads point to double labeled fibers), hallmarks of Bergmann glia. (C) GFP<sup>+</sup> Müller glial cells, arrowheads mark radial fiber. DAPI is shown in blue, GFP in green, and other markers in red. (Scale bar, 50  $\mu$ m.)
